# Supplementary material for: Enhanced electrocatalytic performance of TiO2 nanoparticles by Pd doping toward ammonia synthesis under ambient conditions
Source: Royal Society of Chemistry journal article supplement (doi:10.1039/d1cc06778h), 2022-01-01
Supplement: d1cc06778h1.pdf [file d1cc06778h1.pdf]

## Electronic Supplementary Information

### Experimental section

**Materials:** Titanium oxysulfate ( $\text{TiOSO}_4 \cdot 2\text{H}_2\text{O}$ ), ethanol ( $\text{CH}_3\text{CH}_2\text{OH}$ ), glycerol ( $\text{C}_3\text{H}_8\text{O}_3$ ), palladium dichloride ( $\text{PdCl}_2$ ), hydrochloric acid ( $\text{HCl}$ ), sodium sulfate ( $\text{Na}_2\text{SO}_4$ ), ammonium chloride ( $\text{NH}_4\text{Cl}$ ), hydrazine hydrate ( $\text{N}_2\text{H}_4 \cdot \text{H}_2\text{O}$ ), sodium hypochlorite ( $\text{NaClO}$ ), sodium salicylate ( $\text{C}_7\text{H}_5\text{O}_3\text{Na}$ ), sodium hydroxide ( $\text{NaOH}$ ), para-(dimethylamino) benzaldehyde ( $\text{C}_9\text{H}_{11}\text{NO}$ ), sodium nitroferricyanide (III) dihydrate ( $\text{Na}_2\text{Fe}(\text{CN})_5\text{NO} \cdot 2\text{H}_2\text{O}$ ), and 5 wt% Nafion solution were purchased from Aladdin Co., Ltd. (Shanghai, China). Carbon paper was purchased from Taiwan CeTech Company. All chemical reagents are analytical grade without further purification.

**Preparation of Pd-TiO<sub>2</sub> and pristine TiO<sub>2</sub>:** Pd-TiO<sub>2</sub> was prepared as follows. 2.40 g  $\text{TiOSO}_4 \cdot 2\text{H}_2\text{O}$ , 20 mL ethanol, 12 mL deionized water, 9 mL glycerol and 0.02 g  $\text{PdCl}_2$  were mixed and stirred for 1 h. After that, the above mixture was transferred to a Teflon-lined autoclave and maintained in an oven at 200 °C for 9 h. After cooling to room temperature, the product was collected by filtration and washed several times with ethanol and deionized water. Finally, it was dried overnight in a vacuum oven at 60 °C and designated as Pd-TiO<sub>2</sub>. For comparison, pristine TiO<sub>2</sub> was prepared via a similar procedure without the presence of  $\text{PdCl}_2$ .

**Preparation of Pd-TiO<sub>2</sub>/CP:** Typically, 10 mg of Pd-TiO<sub>2</sub> catalyst was dispersed in a mixed solution containing 40 μL of 5 wt% Nafion solution, 240 μL of deionized water and 720 μL of ethanol, followed by ultrasound for 1 h to form a uniform ink,

and finally 20  $\mu\text{L}$  of the ink was loaded onto a pretreated carbon paper (CP,  $1 \times 1 \text{ cm}^2$ ) and dried under infrared light for later use.

**Characterizations:** X-ray powder diffraction (XRD) patterns were collected on a Shimadzu XRD-6100 diffractometer (Shimadzu, Japan) with a Cu  $K\alpha$  X-ray source. Transmission electron microscopy (TEM) images were conducted on a Zeiss Libra 200FE transmission electron microscope at an acceleration voltage of 200 kV. X-ray photoelectron spectroscopy (XPS) measurements were carried out on an ESCALAB 250Xi spectrometer equipped with monochromatized Al  $K\alpha$  radiation. Raman spectra are obtained by a LabRAM HR Evolution Raman spectroscopy. Ultraviolet-visible (UV-vis) spectroscopy measurements were performed on a Shimadzu UV-1800 UV-vis spectrophotometer. The ion chromatography (IC) data were obtained by using a ThermoFisher ICS 5000 plus IC.

**Electrochemical measurements:** The electrochemical measurements were carried out in a gastight H-type cell separated by a Nafion 211 membrane using a three-electrode configuration. Before NRR tests, the Nafion membrane was pretreated by heating in the 3%  $\text{H}_2\text{O}_2$  solution and 0.5 M  $\text{H}_2\text{SO}_4$  at 80  $^\circ\text{C}$  for 1 h, respectively, and then washing with ultrapure water for another 1 h. We used a CHI760E electrochemical workstation (Shanghai, Chenhua) to conduct electrochemical experiments. In this work, the obtained Pd-TiO<sub>2</sub>/CP, Ag/AgCl/saturated KCl, and graphite rod were used as the working electrode, reference electrode, and counter electrode, respectively. All potentials were converted to the RHE through calibration ( $E$  (vs RHE) =  $E$  (vs Ag/AgCl) + 0.197 V + 0.059  $\times$  pH).

**Determination of NH<sub>3</sub>:** Concentration of produced NH<sub>3</sub> was spectrophotometrically determined by the indophenol blue method. Specifically, 4 mL electrolyte was obtained from the cathodic chamber and mixed with 50 μL oxidizing solution containing NaClO (pCl = 4 ~ 4.9) and NaOH (0.75 M), 500 μL coloring solution containing 0.4 M C<sub>7</sub>H<sub>6</sub>O<sub>3</sub>Na and 0.32 M NaOH, and 50 μL catalyst solution (1 wt% Na<sub>2</sub>[Fe(CN)<sub>5</sub>NO]) for 1 h. Absorbance measurements were performed at λ = 655 nm. The concentration-absorbance curve was calibrated using standard NH<sub>4</sub><sup>+</sup> solution with a series of concentrations. The fitting curve (y = 0.5142x + 0.0204, R<sup>2</sup> = 0.999) shows good linear relation of absorbance value with NH<sub>4</sub><sup>+</sup> concentration.

**Determination of N<sub>2</sub>H<sub>4</sub>:** The N<sub>2</sub>H<sub>4</sub> in the electrolyte was determined by the method of Watt and Chrisp. The mixture of C<sub>9</sub>H<sub>11</sub>NO (5.99 g), HCl (30 mL), and C<sub>2</sub>H<sub>5</sub>OH (300 mL) was used as a color reagent. In detail, 5 mL electrolyte was removed from the electrochemical reaction vessel, and added into 5 mL above prepared color reagent and stirring 10 min at room temperature. Moreover, the absorbance of the resulting solution was measured at a wavelength of 460 nm. The concentration absorbance curves were calibrated using standard N<sub>2</sub>H<sub>4</sub> solution with a series of concentrations. The fitting curve (y = 0.645x + 0.016, R<sup>2</sup> = 0.996) shows good linear relation of absorbance value with N<sub>2</sub>H<sub>4</sub> concentration.

#### **Calculations of NH<sub>3</sub> yield and FE:**

NH<sub>3</sub> yield was calculated using the following equation:

$$\text{NH}_3 \text{ yield} = [\text{NH}_3] \times V / (t \times m_{\text{cat}}) \quad (1)$$

The amount of NH<sub>3</sub> produced was calculated as follows:

$$m_{\text{NH}_3} = [\text{NH}_3] \times V \quad (2)$$

FE was calculated according to following equation:

$$\text{FE} = 3F \times [\text{NH}_3] \times V / (17 \times Q) \times 100\% \quad (3)$$

where  $[\text{NH}_3]$  is the measured  $\text{NH}_3$  concentration,  $V$  is the volume of the electrolyte in the cathodic chamber,  $t$  is the reduction time,  $m_{\text{cat}}$  is the loaded mass of catalyst on carbon paper,  $F$  is the Faraday constant, and  $Q$  is the total transferred charge during NRR test.

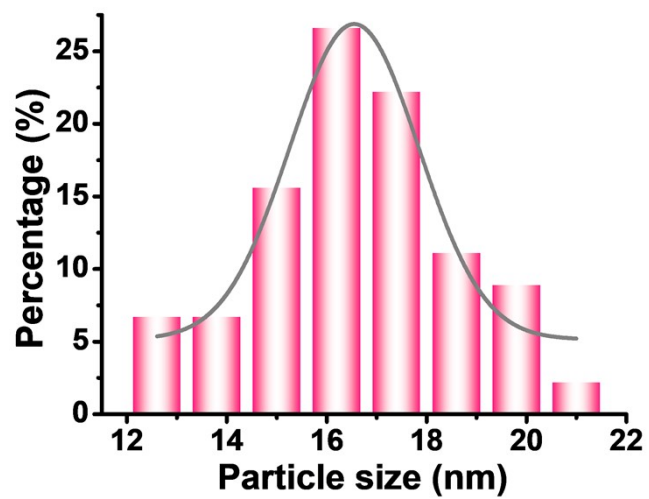

**Fig. S1.** Size distribution of Pd-TiO<sub>2</sub> nanoparticles.

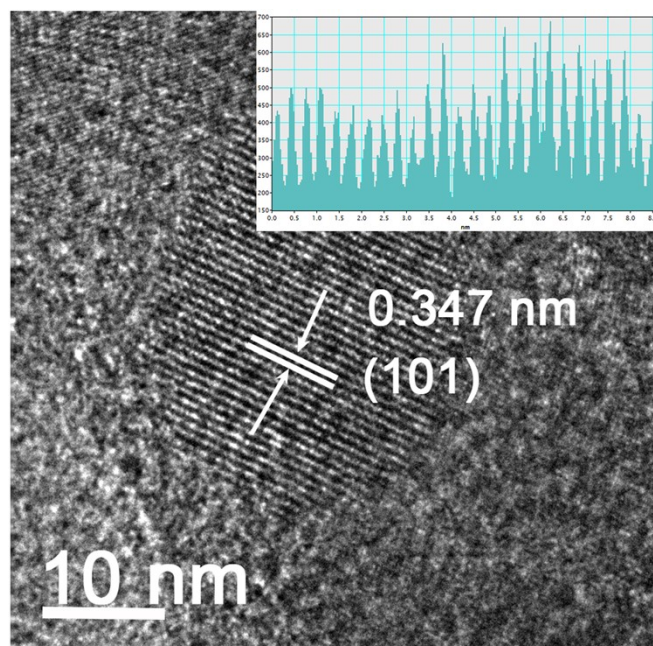

**Fig. S2.** HRTEM image of pristine TiO<sub>2</sub>.

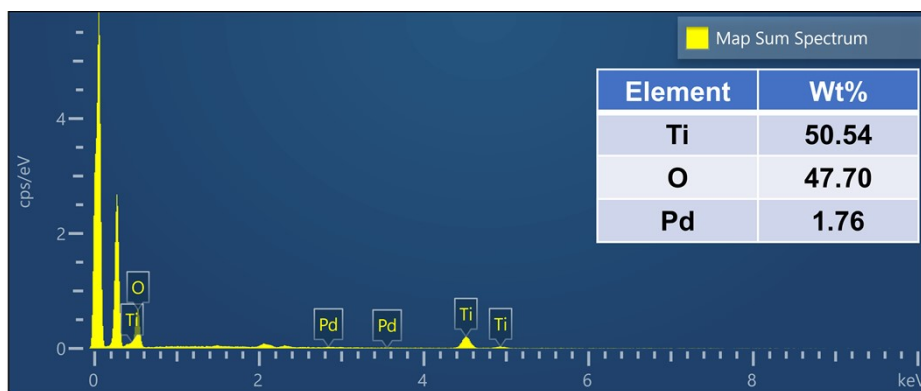

**Fig. S3.** EDX spectrum of Pd-TiO<sub>2</sub> nanoparticles.

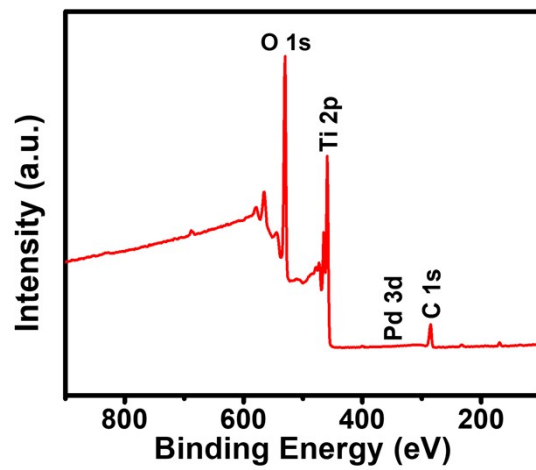

**Fig. S4.** XPS survey spectrum of Pd-TiO<sub>2</sub> nanoparticles.



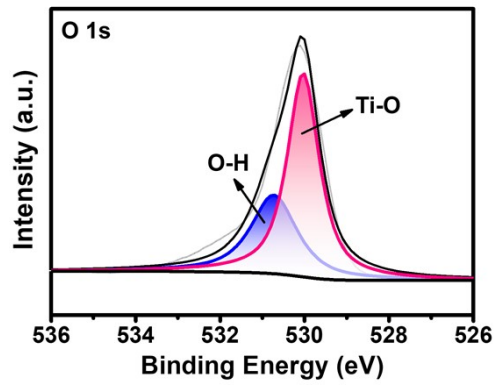

**Fig. S5.** XPS spectrum of O 1s region for Pd-TiO<sub>2</sub>.

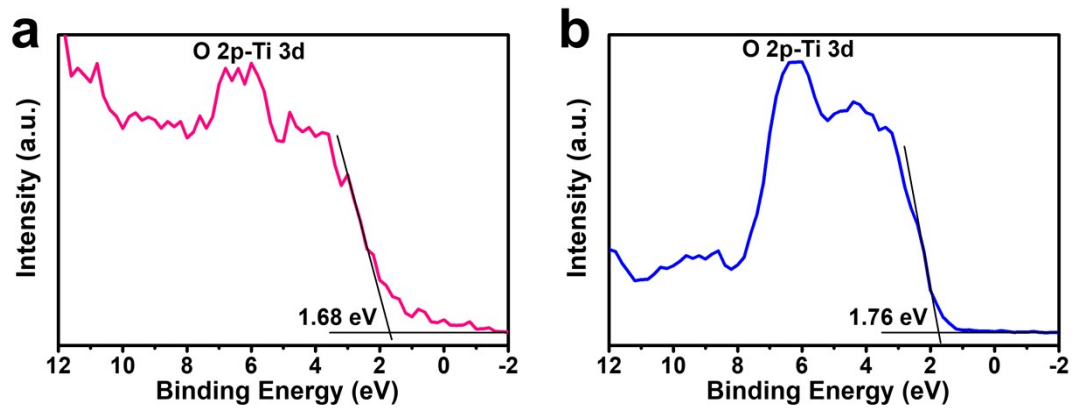

**Fig. S6.** VB-XPS spectra for (a) Pd-TiO<sub>2</sub> and (b) TiO<sub>2</sub> samples.

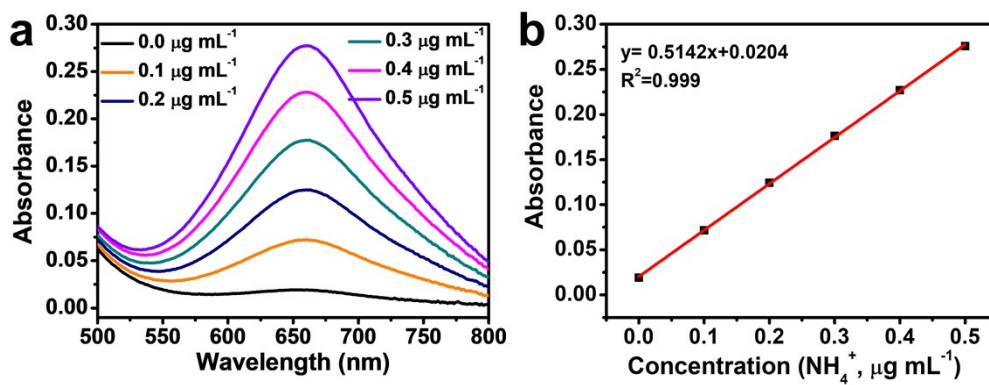

**Fig. S7.** (a) UV-vis absorption spectra of indophenol assays with  $\text{NH}_3$  concentrations after incubated for 2 h at room temperature. (b) Calibration curve used for calculation of  $\text{NH}_3$  concentrations.

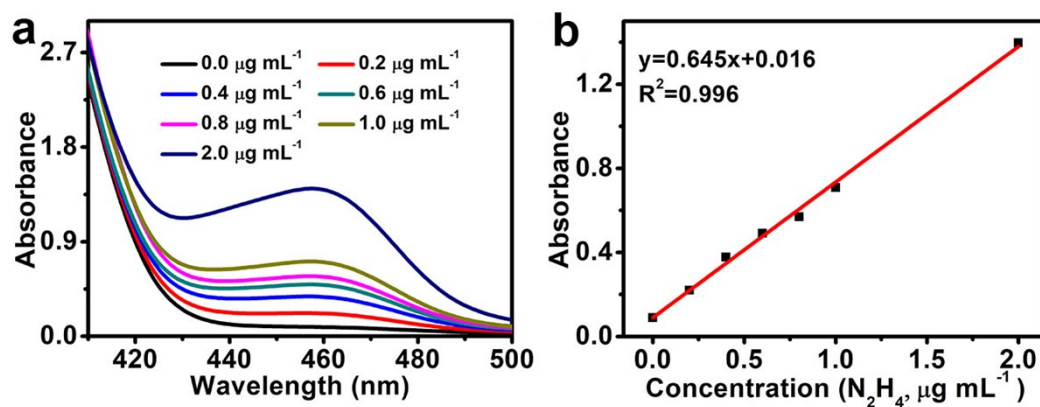

**Fig. S8.** (a) UV-vis absorption spectra of various  $N_2H_4$  concentrations after incubated for 10 min at room temperature. (b) Calibration curve used for calculation of  $N_2H_4$  concentrations.

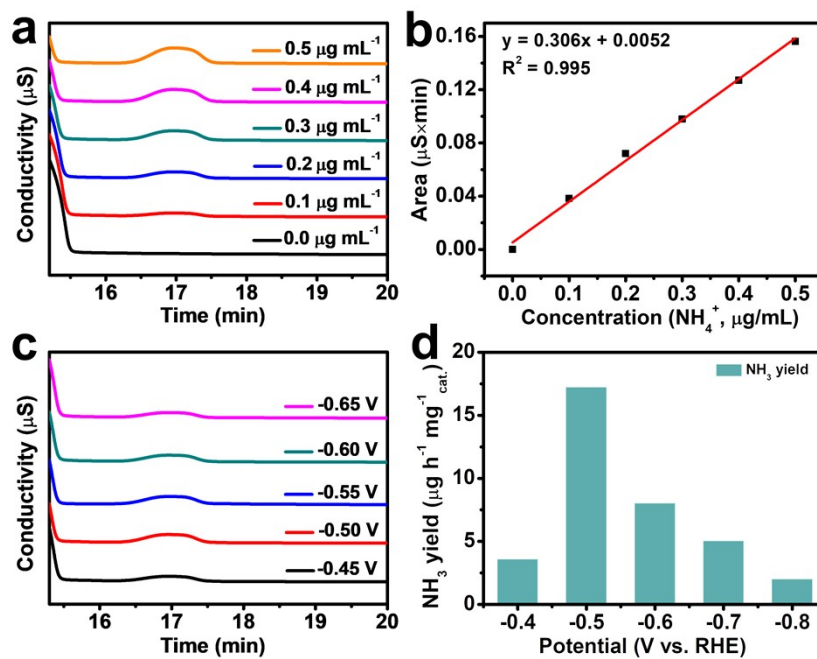

**Fig. S9.** (a) Ion chromatogram curves of the standard solution with NH<sub>4</sub><sup>+</sup> concentrations in 0.1 M Na<sub>2</sub>SO<sub>4</sub>. (b) Calibration curve used for estimation of NH<sub>4</sub><sup>+</sup>. (c) Ion chromatogram for the electrolytes at a series of potentials after electrolysis for 2 h. (d) NH<sub>3</sub> yields and FEs for Pd-TiO<sub>2</sub>/CP at corresponding potentials.

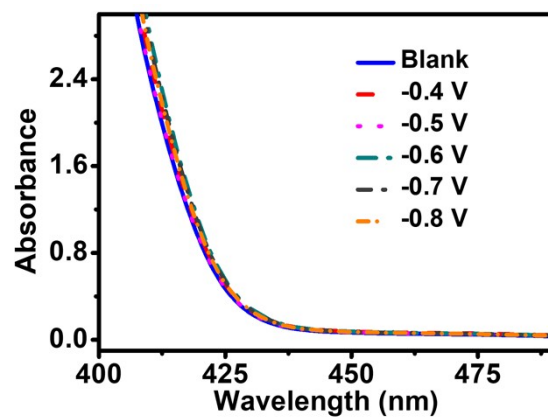

**Fig. S10.** UV-vis absorption spectra of the electrolytes stained with p-C<sub>9</sub>H<sub>11</sub>NO indicator after 2 h electrolysis in N<sub>2</sub> atmosphere at a series of potentials.

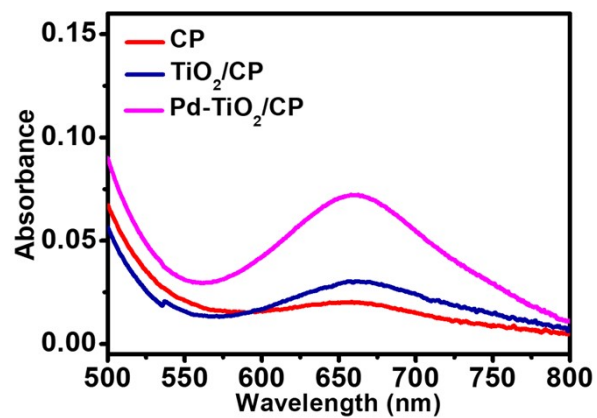

**Fig. S11.** UV-vis absorption spectra of 0.1 M Na<sub>2</sub>SO<sub>4</sub> electrolyte stained with indophenol indicator after 2 h electrolysis at the potential of -0.50 V.

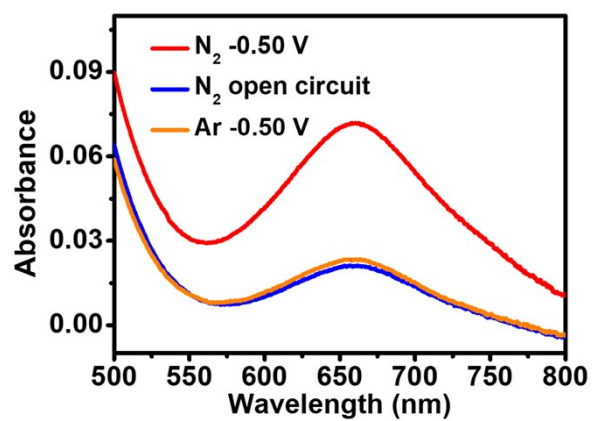

**Fig. S12.** UV-vis absorption spectra of the electrolytes stained with indophenol indicator for the Pd-TiO<sub>2</sub>/CP electrode after 2 h electrolysis at -0.50 V under different electrochemical conditions.



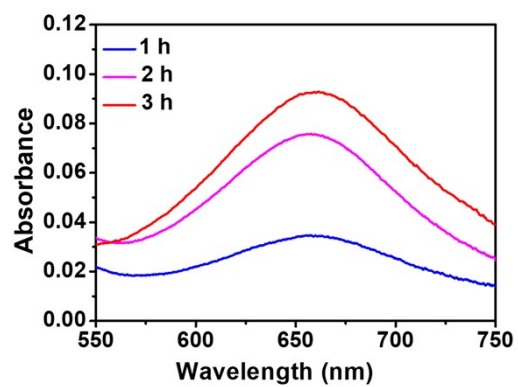

**Fig. S13.** UV-vis absorption spectra of electrolyte stained with indophenol indicator after 2 h potentiostatic test at -0.50 V for 1 h, 2 h, and 3 h, respectively.

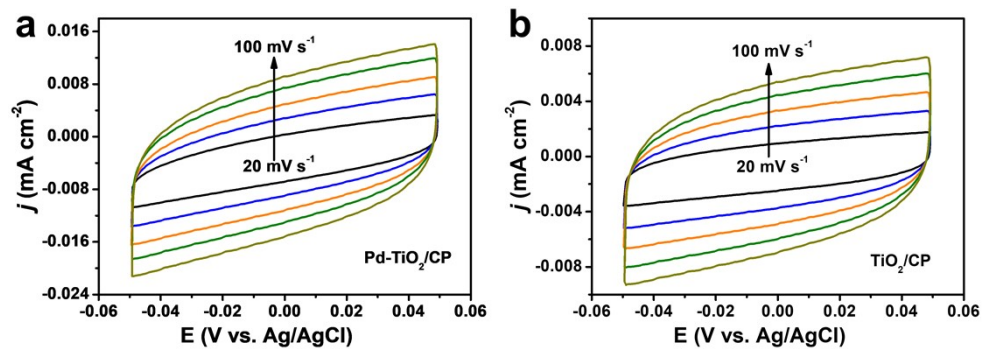

**Fig. S14.** Cyclic voltammetry curves of (a) Pd-TiO<sub>2</sub>/CP and (b) TiO<sub>2</sub>/CP with various scan rates (20-100 mV s<sup>-1</sup>).

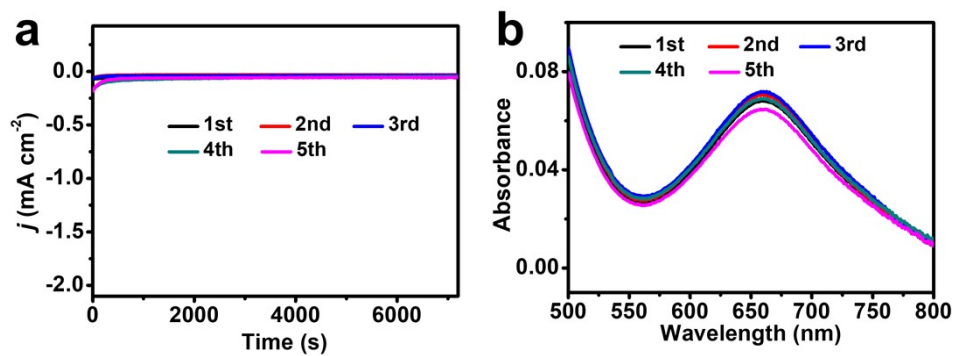

**Fig. S15.** (a) Chronoamperometry curves of Pd-TiO<sub>2</sub>/CP at -0.50 V vs. RHE for continuous cycles. (b) UV-vis absorption spectra of the electrolytes stained with an NH<sub>3</sub> color agent for continuous cycles.

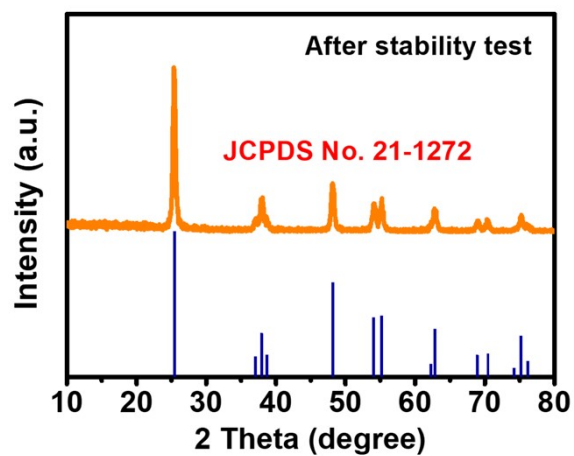

**Fig. S16.** XRD pattern for Pd-TiO<sub>2</sub> after stability test.

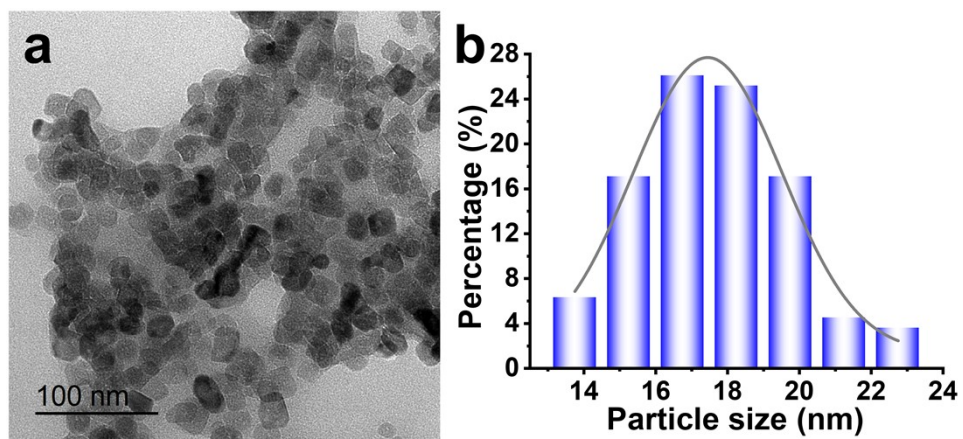

**Fig. S17.** (a)TEM image and (b) size distribution for Pd-TiO<sub>2</sub> after stability test.

**Table S1.** Comparison of the electrocatalytic NRR performance of Pd-TiO<sub>2</sub> with other Pd- and Ti-based NRR electrocatalysts under ambient conditions in aqueous media.

| Catalysts                                | Electrolyte                           | NH <sub>3</sub> yield                                       | FE (%) | Ref.      |
|------------------------------------------|---------------------------------------|-------------------------------------------------------------|--------|-----------|
| Pd-TiO <sub>2</sub>                      | 0.1 M Na <sub>2</sub> SO <sub>4</sub> | 17.4 μg h <sup>-1</sup> mg <sub>cat.</sub> <sup>-1</sup>    | 12.7   | This work |
| Pd/C                                     | 0.1 M PBS                             | 4.5 μg h <sup>-1</sup> mg <sub>cat.</sub> <sup>-1</sup>     | 8.2    | 1         |
| Pd <sub>0.2</sub> Cu <sub>0.8</sub> /rGO | 0.1 M KOH                             | 2.8 μg h <sup>-1</sup> mg <sub>cat.</sub> <sup>-1</sup>     | -      | 2         |
| Pd nanoparticles                         | 0.1 M Na <sub>2</sub> SO <sub>4</sub> | 24.12 μg h <sup>-1</sup> mg <sub>cat.</sub> <sup>-1</sup>   | 9.49   | 3         |
| PdO/Pd/CNTs                              | 0.1 M NaOH                            | 18.2 μg h <sup>-1</sup> mg <sub>cat.</sub> <sup>-1</sup>    | 11.5   | 4         |
| Pd-Ag-S                                  | 0.1 M Na <sub>2</sub> SO <sub>4</sub> | 9.73 μg h <sup>-1</sup> mg <sub>cat.</sub> <sup>-1</sup>    | 18.41  | 5         |
| C-doped TiO <sub>2</sub>                 | 0.1 M Na <sub>2</sub> SO <sub>4</sub> | 16.22 μg h <sup>-1</sup> mg <sub>cat.</sub> <sup>-1</sup>   | 1.84   | 6         |
| B-doped TiO <sub>2</sub>                 | 0.1 M Na <sub>2</sub> SO <sub>4</sub> | 14.4 μg h <sup>-1</sup> mg <sub>cat.</sub> <sup>-1</sup>    | 3.4    | 7         |
| Mn-TiO <sub>2</sub>                      | 0.1 M Na <sub>2</sub> SO <sub>4</sub> | 20.05 μg h <sup>-1</sup> mg <sub>cat.</sub> <sup>-1</sup>   | 11.93  | 8         |
| TiO <sub>2</sub> /Ti                     | 0.1 M Na <sub>2</sub> SO <sub>4</sub> | 5.6 μg h <sup>-1</sup> mg <sub>cat.</sub> <sup>-1</sup>     | 2.5    | 9         |
| Ti <sup>3+</sup> -TiO <sub>2-x</sub> /TM | 0.1 M Na <sub>2</sub> SO <sub>4</sub> | 3.51×10 <sup>-10</sup> mol s <sup>-1</sup> cm <sup>-2</sup> | 14.62  | 10        |
| d-TiO <sub>2</sub> /TM                   | 0.1 M HCl                             | 7.58 μg h <sup>-1</sup> mg <sub>cat.</sub> <sup>-1</sup>    | 9.17   | 11        |
| Y-TiO <sub>2</sub> -C                    | 0.1 M HCl                             | 6.3 μg h <sup>-1</sup> mg <sub>cat.</sub> <sup>-1</sup>     | 11.0   | 12        |
| TiO <sub>2</sub> -rGO                    | 0.1 M Na <sub>2</sub> SO <sub>4</sub> | 15.13 μg h <sup>-1</sup> mg <sub>cat.</sub> <sup>-1</sup>   | 3.3    | 13        |
| TA-reduced Au/TiO <sub>2</sub>           | 0.1 M HCl                             | 21.4 μg h <sup>-1</sup> mg <sub>cat.</sub> <sup>-1</sup>    | 8.11   | 14        |
| TiS <sub>2</sub> nanosheets              | 0.1 M Na <sub>2</sub> SO <sub>4</sub> | 16.02 μg h <sup>-1</sup> mg <sub>cat.</sub> <sup>-1</sup>   | 5.5    | 15        |
| C-Ti <sub>x</sub> O <sub>y</sub> /C      | 0.1 M Li <sub>2</sub> SO <sub>4</sub> | 14.8 μg h <sup>-1</sup> mg <sub>cat.</sub> <sup>-1</sup>    | 17.8   | 16        |
| TiC/C NF                                 | 0.1 M HCl                             | 14.1 μg h <sup>-1</sup> mg <sub>cat.</sub> <sup>-1</sup>    | 5.8    | 17        |

|                           |           |                                         |      |    |
|---------------------------|-----------|-----------------------------------------|------|----|
| Zr-doped TiO <sub>2</sub> | 1.0 M KOH | 8.9 μg h <sup>-1</sup> cm <sup>-2</sup> | 17.3 | 18 |
|---------------------------|-----------|-----------------------------------------|------|----|

## References

- 1 J. Wang, L. Yu, L. Hu, G. Chen, H. Xin and X. Feng, *Nat. Commun.*, 2018, **9**, 1-7.
- 2 M. M. Shi, D. Bao, S. J. Li, B. R. Wulan, J. M. Yan and Q. Jiang, *Adv. Energy Mater.*, 2018, **8**, 1800124.
- 3 G. Deng, T. Wang, A. A. Alshehri, K. A. Alzahrani, Y. Wang, H. Ye, Y. Luo and X. Sun, *J. Mater. Chem. A*, 2019, **7**, 21674-21677.
- 4 J. Lv, S. Wu, Z. Tian, Y. Ye, J. Liu and C. Liang, *J. Mater. Chem. A*, 2019, **7**, 12627-12634.
- 5 H. Wang, S. Liu, H. Zhang, S. Yin, Y. Xu, X. Li, Z. Wang and L. Wang, *Nanoscale*, 2020, **12**, 13507-13512.
- 6 K. Jia, Y. Wang, Q. Pan, B. Zhong, Y. Luo, G. Cui, X. Guo and X. Sun, *Nanoscale Adv.*, 2019, **1**, 961-964.
- 7 Y. Wang, K. Jia, Q. Pan, Y. Xu, Q. Liu, G. Cui, X. Guo and X. Sun, *ACS Sustainable Chem. Eng.*, 2018, **7**, 117-122.
- 8 H. Chen, T. Wu, X. Li, S. Lu, F. Zhang, Y. Wang, H. Zhao, Q. Liu, Y. Luo and A. M. Asiri, Z. Feng, Y. Zhang and X. Sun, *ACS Sustainable Chem. Eng.*, 2021, **9**, 1512-1517.
- 9 R. Zhang, X. Ren, X. Shi, F. Xie, B. Zheng, X. Guo and X. Sun, *ACS Appl. Mater. Interfaces*, 2018, **10**, 28251-28255.
- 10 B. Li, X. Zhu, J. Wang, R. Xing, Q. Liu, X. Shi, Y. Luo, S. Liu, X. Niu and X. Sun, *Chem. Commun.*, 2020, **56**, 1074-1077.



- 11 L. Yang, T. Wu, R. Zhang, H. Zhou, L. Xia, X. Shi, H. Zheng, Y. Zhang and X. Sun, *Nanoscale*, 2019, **11**, 1555-1562.
- 12 L. Yang, C. Choi, S. Hong, Z. Liu, Z. Zhao, M. Yang, H. Shen, A. W. Robertson, H. Zhang, T. W. B. Lo, Y. Jung and Z. Sun, *Chem. Commun.*, 2020, **56**, 10910-10913.
- 13 X. Zhang, Q. Liu, X. Shi, A. M. Asiri, Y. Luo, X. Sun and T. Li, *J. Mater. Chem. A*, 2018, **6**, 17303-17306.
- 14 M. M. Shi, D. Bao, B. R. Wulan, Y. H. Li, Y. F. Zhang, J. M. Yan and Q. Jiang, *Adv. Mater.*, 2017, **29**, 1606550.
- 15 K. Jia, Y. Wang, L. Qiu, J. Gao, Q. Pan, W. Kong, X. Zhang, A. A. Alshehri, K. A. Alzahrani B. Zhong, X. Guo and L. Yang, *Inorg. Chem. Front.*, 2019, **6**, 1986-1989.
- 16 Q. Qin, Y. Zhao, M. Schmallegger, T. Heil, J. Schmidt, R. Walczak, G. Gescheidt-Demner, H. Jiao and M. Oschatz, *Angew. Chem. Int. Ed.*, 2019, **58**, 13101-13106.
- 17 G. Yu, H. Guo, W. Kong, T. Wang, Y. Luo, X. Shi, A. M. Asiri, T. Li and X. Sun, *J. Mater. Chem. A*, 2019, **7**, 19657-19661.
- 18 N. Cao, Z. Chen, K. Zang, J. Xu, J. Zhong, J. Luo, X. Xu and G. Zheng, *Nat. Commun.*, 2019, **10**, 2877.
